# Supplementary material
Source: HighWire-hosted journal article supplement (http://molpharm.aspetjournals.org/highwire/filestream/89417/field_highwire_adjunct_files/0/992_supp_data.pdf)
Supplement: 992_supp_data.pdf [file 992_supp_data.pdf]

**Supplementary Data and Methods for** Agonists of the nuclear receptor PPAR $\gamma$  can produce biased signaling.

**Journal:** Molecular Pharmacology

**Authors:**

Mariah Rayl, Michelle D. Nemetcheck, Andrew H. Voss, and Travis S. Hughes

**Manuscript number:** MOLPHARM-AR-2024-000992

**a**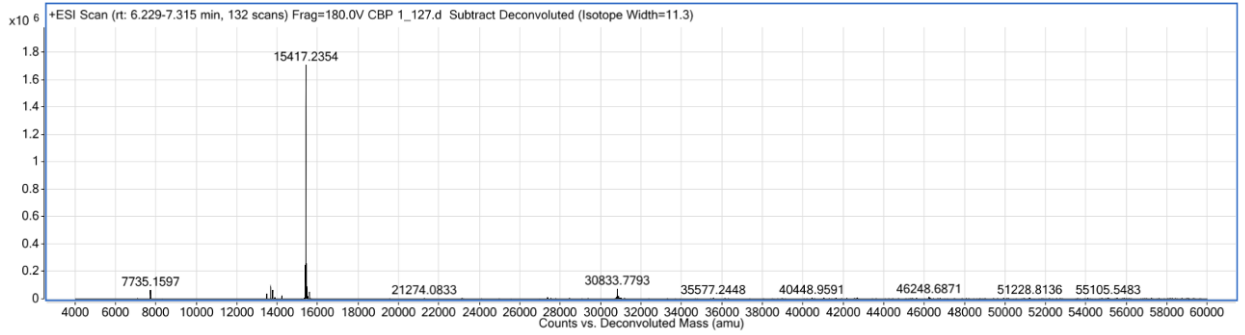**b**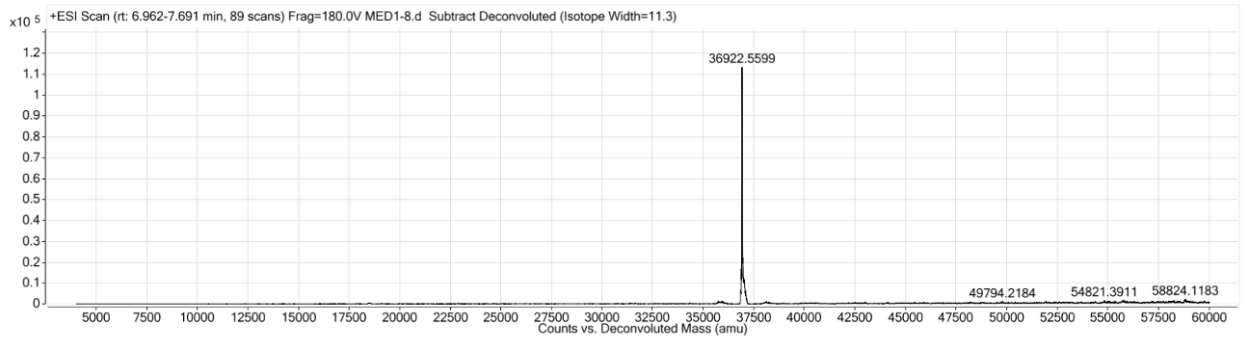**c**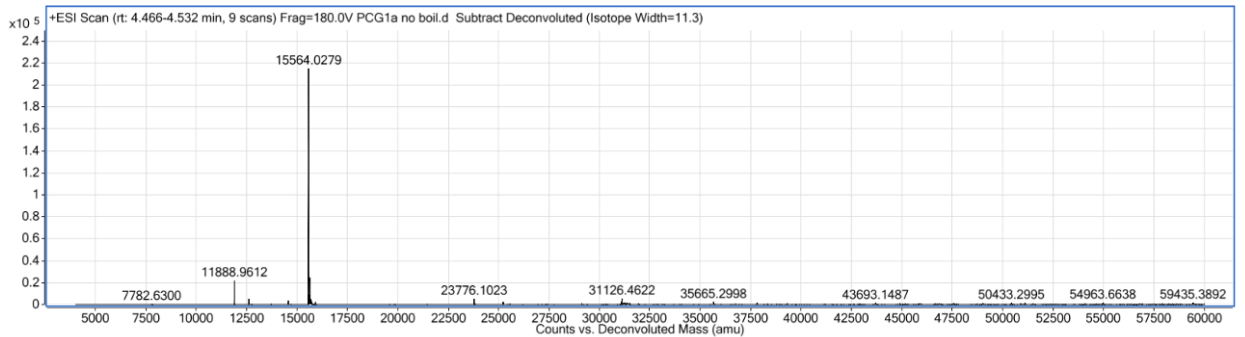

**Supplementary Figure 1: Mass spectrometry of coregulator RID proteins purified and used in complete anisotropy.** Sequences and expected masses are listed in **Table S2**. Proteins were buffer exchanged into 20% acetonitrile in water with 0.1% TFA prior to mass validation by Q-TOF. A) CBP<sub>1-127</sub>, B) MED1<sub>557-870</sub>, and C) PGC1 $\alpha$ <sub>100-220</sub>.

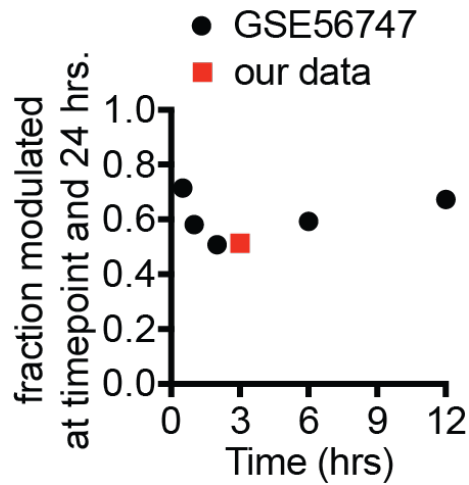

**Supplementary Figure 2.** Proportion of genes that are significantly differentially expressed at both the indicated early timepoint (0.5, 1, 2, 6, and 12 hours) and at 24 hours in mouse 3T3L1 cells by rosiglitazone (deposited data GSE56747; Step et al. *Genes Dev* **28**, 1018–1028, 2014) are shown as black circles, while the proportion of genes differentially expressed at both 3 and 24 hours in human adipocytes (data in panel a) is shown as a red square.

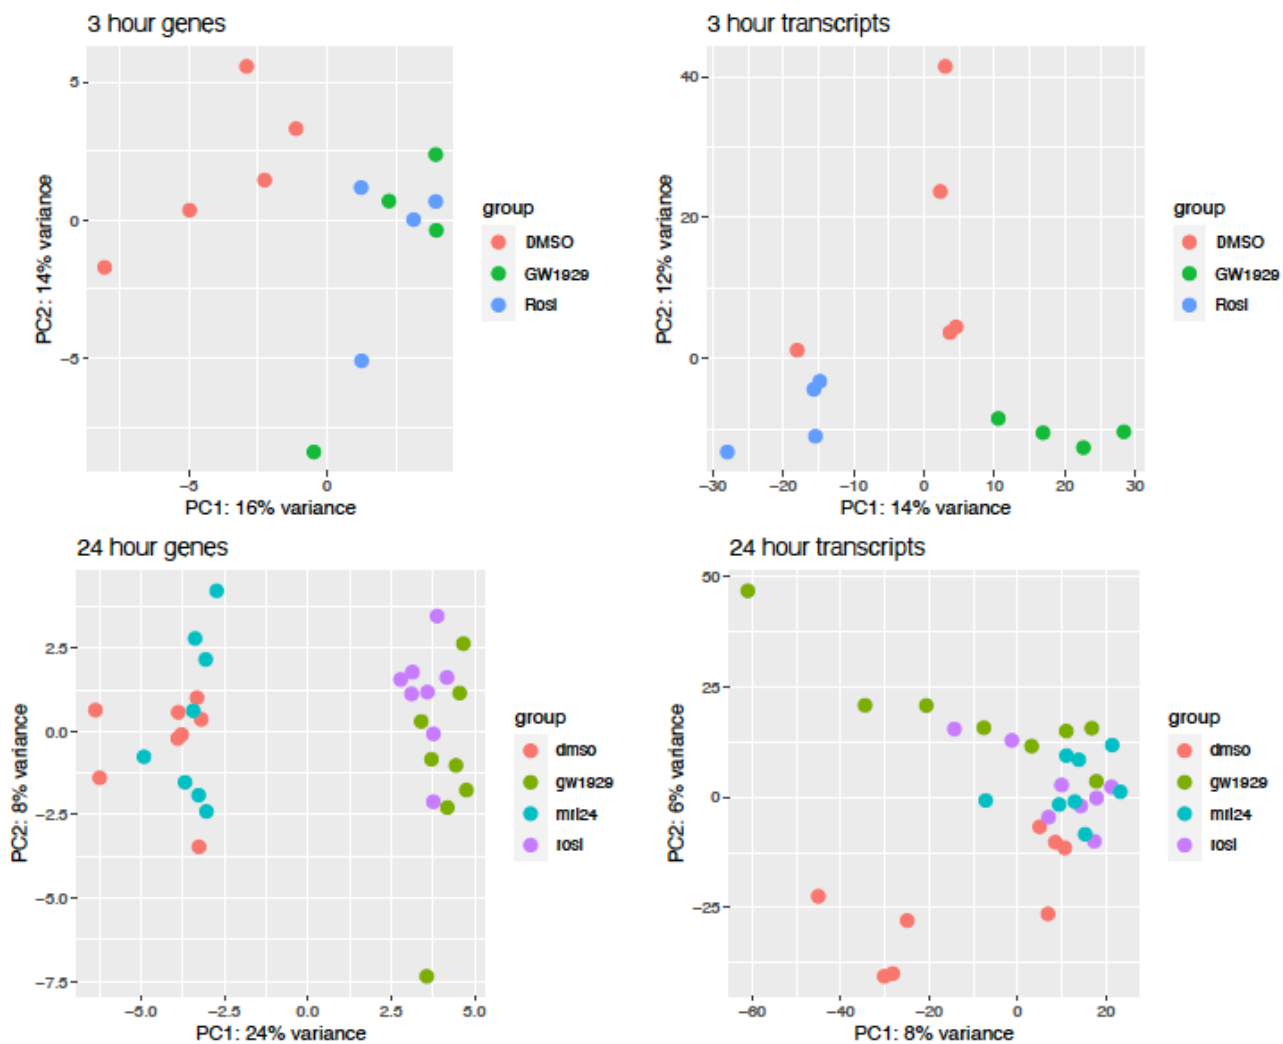

**Supplementary Figure 3:** Principle component analysis of all differentially expressed genes and transcripts at 3 and 24 hours post ligand exposure in human adipocytes (similar to **Figure 2 panel d-e**). This analysis used variance stabilizing transformation.



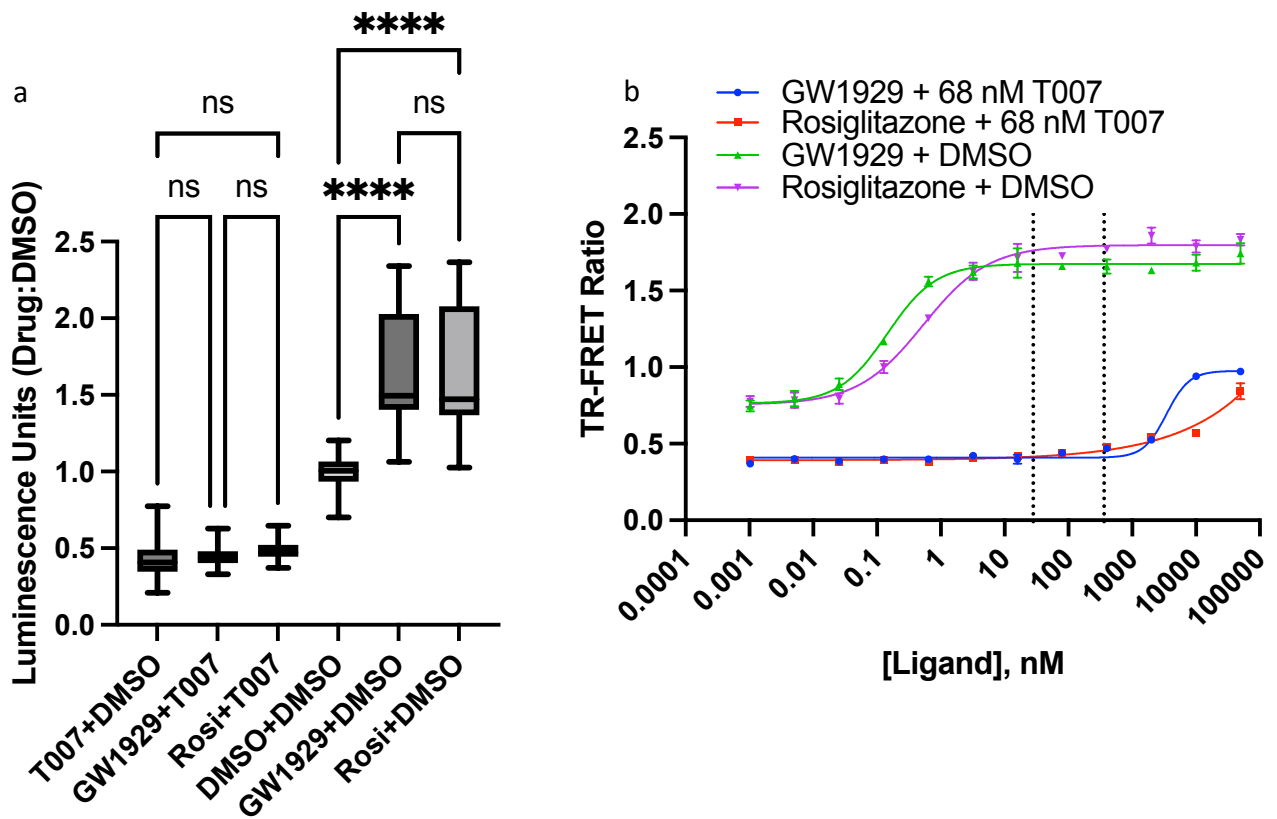

**Supplementary Figure 5: PPAR $\gamma$  can be blocked with the covalent inverse agonist T0070907.**

a) HEK293T cells were transfected with a PPAR $\gamma$  plasmid and a 3X-PPRE-Luciferase plasmid. Cells were treated with DMSO or T0070907 (5  $\mu$ M) for 3 hours and then DMSO or ligand were added. GW1929 was added at 28 nM and rosiglitazone was added at 361 nM. There was no statistical difference between the transactivation for the cells pretreated with T007 (adjusted p-value > 0.9998 for each comparison). GW1929+DMSO and rosiglitazone + DMSO were different than DMSO + DMSO (adjusted p-value < 0.001 for both). GW1929 and rosiglitazone induce the same level of transactivation (adjusted p-value = 0.9656). Significance was determined with a one way ANOVA in Prism9. b) TR-FRET analysis of CBP peptide recruitment to PPAR $\gamma$  using PPAR $\gamma$  (8nM), terbium (0.9 nM), and CBP (400 nM). T0070907 or DMSO was added at 68 nM for 3 hours. After three hours GW1929 or rosiglitazone was titrated in. 3 hours of T0070907 treatment blocked the ability of rosiglitazone and GW1929 to bind PPAR $\gamma$  at the doses used in the adipocyte cell RNA-seq experiments (28 nM for GW1929 and 361 nM for rosiglitazone; vertical dashed lines). See **Datafile4.xlsx** for underlying data.

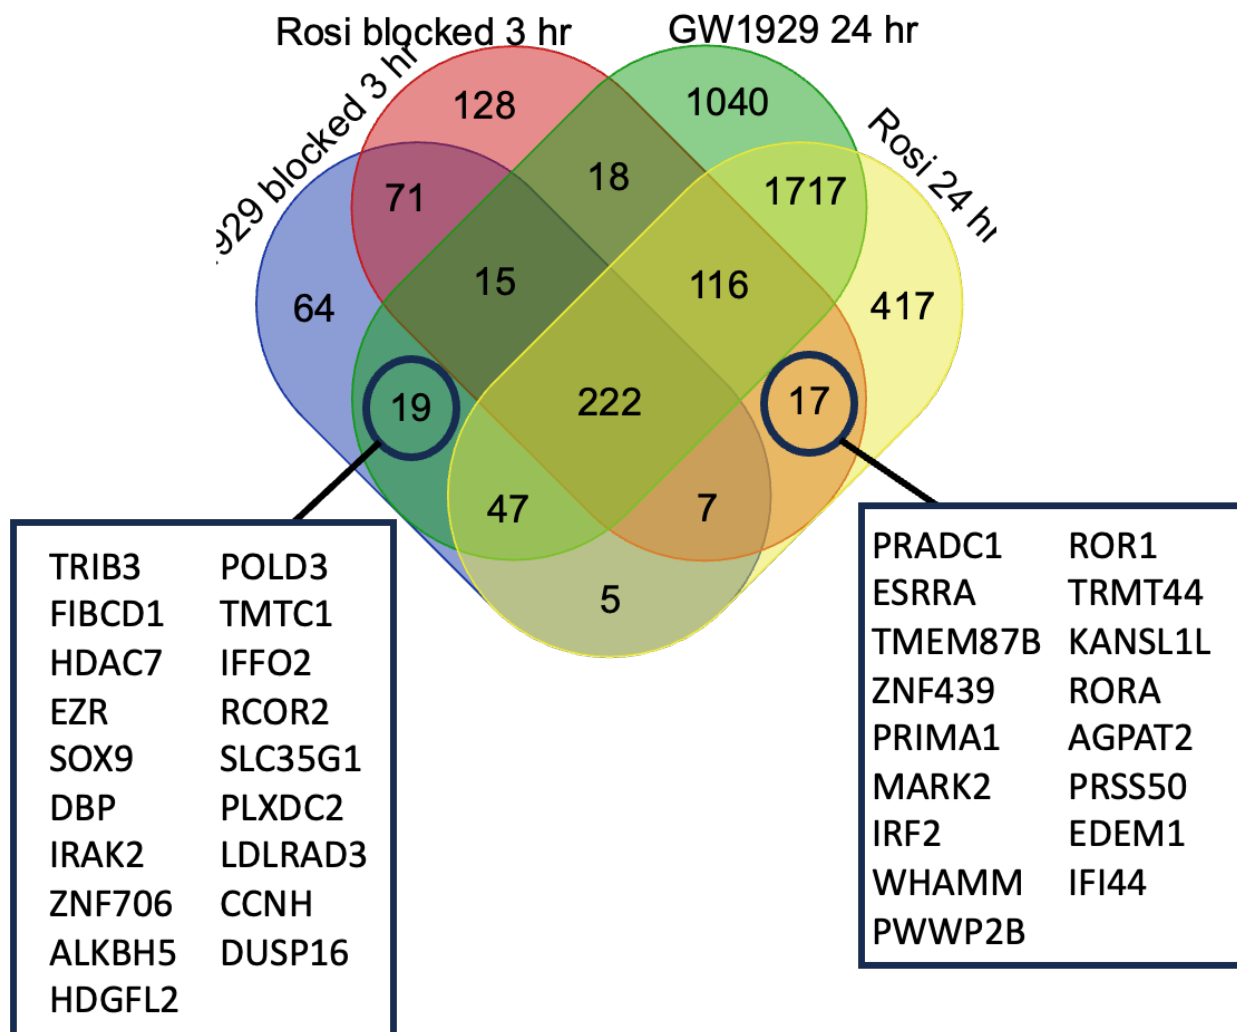

**Supplementary Figure 6. Analysis of T0070907-blocked genes.** A) Analysis of genes that are both blocked by T0070907 at 3 hours and modulated by GW1929 or rosiglitazone is shown. Similar to Figure 2, at 3 and 24 hours each full agonist differentially expresses unique sets of genes (adjusted p-value < 0.05). Human genes that GW1929 or rosiglitazone uniquely affect at both 3 and 24 hours and are blocked by T0070907 pre-treatment are listed. See [Datafile2\\_3h.xlsx](#) for underlying data.

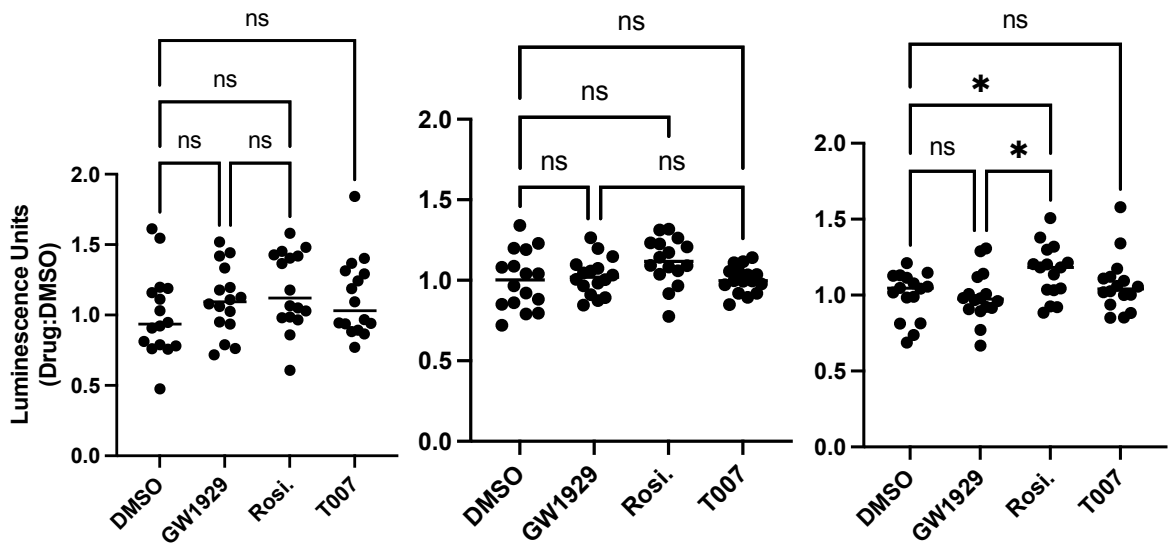

**Supplementary Figure 7: Rosiglitazone and GW1929 do not consistently induce changes from DMSO in HEK293T cells at 3 hours.** Three independent experiments were carried out. In one of these three rosiglitazone induced changes from DMSO different than GW1929 (adjusted p-value = 0.0325). Significance was determined by three separate one-way ANOVAs in Prism 9. See [Datafile4.xlsx](#) for underlying data.



### EC50 of competitive anisotropy over time

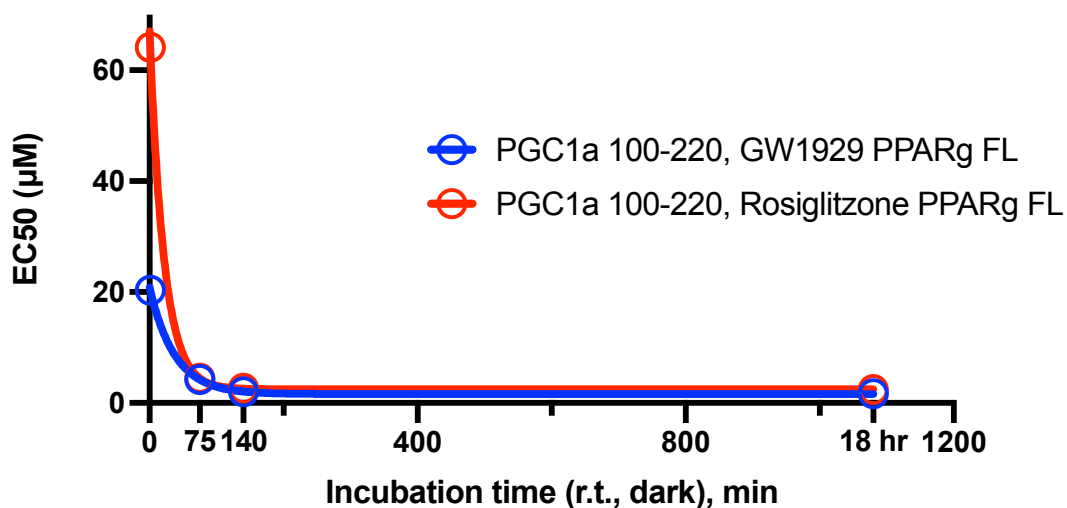

**Supplementary Figure 8: Competitive anisotropy reaches equilibrium at 2 hours at room temperature.** PPAR $\gamma$  FL, 5FAM-CBP peptide, and ligand are mixed at 1:1:1 molar ratio at 800nM with varying concentrations of PGC1 $\alpha_{100-220}$  RID. The effective concentration of PGC1 $\alpha$  RID needed to compete out 50% of 5FAM-CBP (EC50) reaches equilibrium at 140 minutes. A one-phase decay equation was fit to each dataset and showed a half-life ( $t_{1/2}$ ) of 26 min and 15 min for GW1929 and Rosiglitazone-bound PPAR $\gamma$  FL, respectively. A 120 min incubation time was chosen for the competitive anisotropy displayed in **Figure 1** of this work.

Average power vs. sample size with  $\text{fdr}=0.05$ ,  
 $\Delta_g \sim N(4.1757, 3.7466)$  and  $\sigma_g^2 \sim \text{IG}(2.3397, 2.377)$

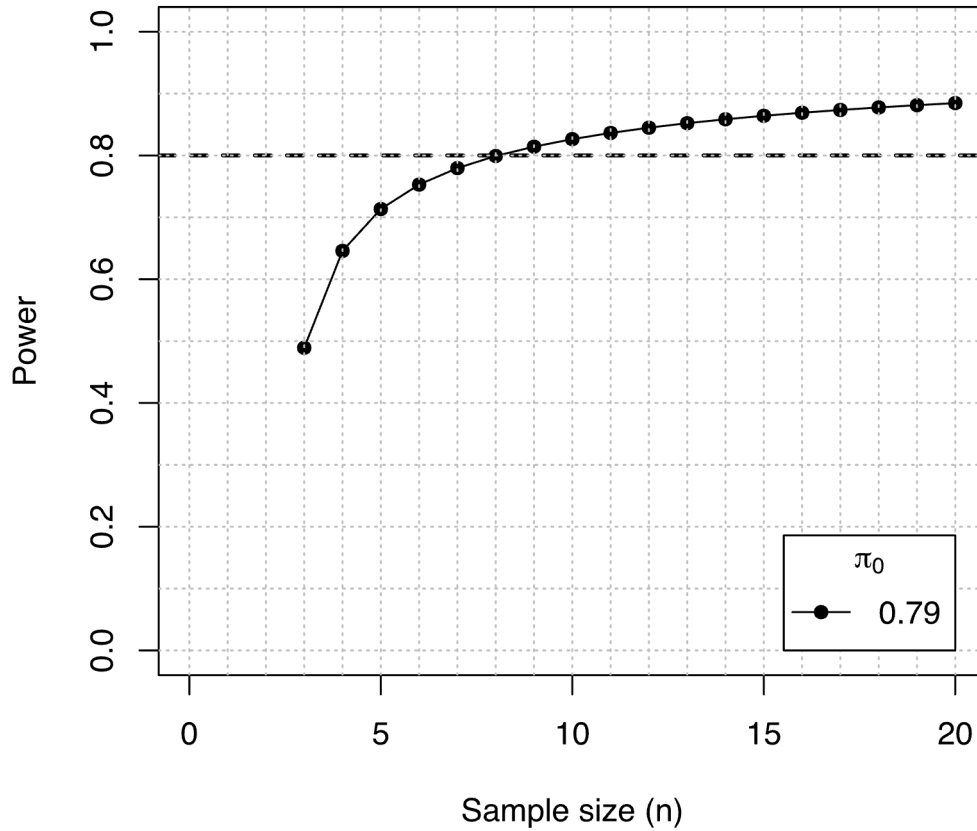

**Supplementary Figure 9: Power analysis indicates that 8 replicates will provide a power of 0.8 at an FDR of 0.05.**

**Supplementary Table 1. Previous reports of putative PPAR $\gamma$  biased agonists in animal models.**

| <b>Ligand*</b>                            | <b>Apparent favored LxxLL type</b>                                                                                              | <b>Form of coactivator used</b> | <b>Adverse effects in animals compared to ref.<sup>§</sup></b>          | <b>Insulin sensitization in animals compared to ref.<sup>§</sup></b> | <b>Ref. agonist</b> |
|-------------------------------------------|---------------------------------------------------------------------------------------------------------------------------------|---------------------------------|-------------------------------------------------------------------------|----------------------------------------------------------------------|---------------------|
| <b>F12016<sup>1</sup></b>                 | S motif (PGC1 $\alpha_{144}$ )                                                                                                  | peptide                         | Less weight gain (less inhibition of osteoblast diff. <i>in vitro</i> ) | similar                                                              | Rosi.               |
| <b>#Amorfrutin B<sup>2</sup></b>          | unclear                                                                                                                         | peptide                         | Less weight gain                                                        | similar                                                              | Rosi.               |
| <b>SR1664<sup>3</sup></b>                 | NA                                                                                                                              | NA                              | Less weight gain and hemodilution                                       | similar                                                              | Rosi.               |
| <b>MBX-102<sup>4</sup></b>                | S motif (PGC1 $\alpha_{144}$ and NCOA1 $_{1435}$ )                                                                              | peptide                         | Less weight gain and hemodilution                                       | similar                                                              | Rosi.               |
| <b>INT-131<sup>5</sup></b>                | Disfavors N-anchored                                                                                                            | peptide                         | Less hemodilution                                                       | similar                                                              | Rosi.               |
| <b>S 26948<sup>6</sup></b>                | Unclear; NCOA1 $_{459-888}$ , PGC1 $\alpha_{190-403}$ , and NCOA2 $_{548-878}$ favored over CBP $_{8-93}$ and MED1 $_{459-803}$ | Yeast two hybrid of RIDs        | Less weight gain                                                        | Similar + antiatherogenic effects                                    | Rosi.               |
| <b>KR-6290<sup>7</sup></b>                | Disfavors N-anchored (MED1)                                                                                                     | Mammalian two-hybrid FL coreg.  | Less weight gain and hemodilution                                       | similar                                                              | Rosi.               |
| <b>telmisartan/irbasartan<sup>8</sup></b> | unclear                                                                                                                         | peptide                         | Less weight gain                                                        | Not as good but better than vehicle                                  | Rosi.               |
| <b>FMOC-L-Leucine<sup>9</sup></b>         | Unclear; favors NCOA1                                                                                                           | Mammalian two-hybrid FL         | Less weight gain                                                        | similar                                                              | Rosi.               |
| <b>NTZDpa<sup>10,11</sup></b>             | S motif (PGC1 $\alpha_{144}$ )                                                                                                  | peptide                         | Less weight gain and hemodilution                                       | similar                                                              | TZDfa/Rosi.         |
|                                           |                                                                                                                                 |                                 |                                                                         |                                                                      |                     |

**\*Ligand is a partial agonist unless otherwise specified**

**#Significant activity at other receptors**

**§Some of these results are inferred. For example, less heart weight gain infers less hemodilution. Some of the data in the referenced articles is suggestive of biased coactivator recruitment, but such implications went unnoticed or unmentioned in the text.**

**Supplementary Table 2: Q-TOF mass spectrometry masses of proteins expressed and purified from *E. coli* (BL21-De3) for this work.**

| Coregulator RID                  | Protein Sequence                                                                                                                                                                                                                                                                                                                                                                                               | Vector | Predicted mass* (Da) | Experimental mass (Da) |
|----------------------------------|----------------------------------------------------------------------------------------------------------------------------------------------------------------------------------------------------------------------------------------------------------------------------------------------------------------------------------------------------------------------------------------------------------------|--------|----------------------|------------------------|
| CBP1-127                         | MAHHHHHHVGTENLYFQGVGT<br>MAENLLDGPPNPKRAKLSSPGFS<br>ANDSTDFGSLFDLENDLPDELIPN<br>GGELGLLNSGNLVPDAASKHKQL<br>SELLRGGSGSSINPGIGNVSASSP<br>VQQGLGGQAQGGPNSANMASL<br>SAMGKSPLSQGDWW                                                                                                                                                                                                                                 | pET45b | 15416.79             | 15417.2354             |
| MED1 <sup>557-870</sup>          | MAHHHHHHVGTGSNDDDDKSP<br>DPENLYFQGMSTTTPTNTFPGG<br>PITTLFNMSMSIKDRHESVGHGE<br>DFSKVSQNPILTSLLQITGNGGSTI<br>GSSPTPPHHTPPPVSSMAGNTK<br>NHPMLMNLLKDNPAQDFSTLYG<br>SSPLERQNSSSGSPRMEICSGSNK<br>TKKKKSSRLPPEKPKHQTEDDFQ<br>RELFSDVDVDSQNPFDVNMTAD<br>TLDTPHITPAPSQCSTPPTYQPQ<br>VPHPQPSIQRMVRLSSDSIGPD<br>VTDILSDIAEEASKLPSTSDDCPAI<br>GTPLRDSSSSGHSQSTLFDSDVFQ<br>TNNNENPYTDPADLIADAAGSPS<br>SDSPTNHFFHDGVDNFNPDLL | pET45b | 36921.92             | 36922.5599             |
| PGC1 $\alpha$ <sup>100-220</sup> | MAHHHHHHVGTGSNDDDDKSP<br>DPVDEDGLPSFDALTDGDVTTDN<br>EASPSSMPDGTPPPQEAEEPSLLK<br>KLLLAPANTQLSYNECSGLSTQNH<br>ANHNHRIRTNPAIVKTENSWSNK<br>AKSICQQQKQRRPCSELLKYLT<br>NDDP                                                                                                                                                                                                                                          | pET45b | 15565.69             | 15564.0279             |

**Supplementary Table 3: Characteristics of RNA-seq Experiments.**

| Experiment 1  |            |         | Experiment 2         |            |         |
|---------------|------------|---------|----------------------|------------|---------|
| Ligand        | Replicates | Avg RIN | Ligand               | Replicates | Avg RIN |
| DMSO          | 8          | 9.7     | DMSO                 | 5          | 9.9     |
| GW1929        | 8          | 9.7     | GW1929               | 4          | 9.9     |
| MRL24         | 8          | 9.6     | Rosiglitazone        | 4          | 9.9     |
| Rosiglitazone | 8          | 9.6     | T007                 | 5          | 9.9     |
|               |            |         | T007 + GW1929        | 4          | 9.8     |
|               |            |         | T007 + Rosiglitazone | 4          | 9.9     |

Demographics

|                  |                            |                  |                               |
|------------------|----------------------------|------------------|-------------------------------|
| Lot number       | ASC0061                    | Lot number       | ASC0065                       |
| Number of donors | 5                          | Number of donors | 7                             |
| Mean Age         | 41                         | Mean Age         | 44.3                          |
| Sex              | F                          | Sex              | F                             |
| Mean BMI         | 28.1                       | Mean BMI         | 27.6                          |
| Tissue Origin    | Abdomen/Thigh/Flanks       | Tissue Origin    | Thigh/Flanks/Hips/Arm/Abdomen |
| Ethnicity        | Caucasian/African American | Ethnicity        | Caucasian                     |

**Supplementary Table 4: Selectivity index genes converted to human gene names**

| <b>Antidiabetic genes</b> | <b>Adverse genes</b> |
|---------------------------|----------------------|
| AK2                       | NDUFB11              |
| ANGPTL1                   | TMEM14C              |
| C9orf72                   | ACOT8                |
| CAVIN1                    | SLC25A20             |
| CD36                      | COX7A2               |
| CFL2                      | NUDT7                |
| DIXDC1                    | SLC25A11             |
| EMC4                      | RAMP1                |
| FABP4                     | PTPRN                |
| FABP9                     | WBP1                 |
| LRRC27                    | ABHD12               |
| MSS51                     | CPT2                 |
| MXRA8                     | ACADVL               |
| NAP1L1                    |                      |
| NKTR                      |                      |
| PIGK                      |                      |
| PPP2R5A                   |                      |
| QKI                       |                      |
| RANBP9                    |                      |
| RGS7                      |                      |
| RORA                      |                      |
| RTF2                      |                      |
| S100A11                   |                      |
| SDSL                      |                      |
| TMEM126B                  |                      |
| YPEL5                     |                      |
| ZWINT                     |                      |

**Supplementary Table 5: Selectivity Index**

|                 | <b>GW1929</b> | <b>Rosiglitazone</b> | <b>MRL24</b>  |
|-----------------|---------------|----------------------|---------------|
| <b>3 hours</b>  | 5.057         | 2.331                | not performed |
| <b>24 hours</b> | -4.111        | -4.032               | 0.361         |

---

**Supplementary Table 6: PPAR $\gamma$  ligands – doses used experimentally**

---

| Ligand        | Type            | Experimental Dose (nM) | PPAR $\gamma$ Ki (nM) | PPAR $\delta$ Ki (nM) | PPAR $\alpha$ Ki (nM) |
|---------------|-----------------|------------------------|-----------------------|-----------------------|-----------------------|
| GW1929        | Agonist         | 28                     | <1                    | 2344                  | 2626                  |
| Rosiglitazone | Agonist         | 361                    | 11                    | none detected         | 35589                 |
| MRL24         | Partial agonist | 166                    | <1                    | none detected         | 15758                 |

---

## Supplementary Methods 1. Derivation of occupancy equation and assumptions used in the derivation.

We define the equilibrium dissociation constant for ligand A ( $K_A$ ) as:

$$K_A = \frac{[R][A]}{[RA]}$$

Similarly for ligand B:

$$K_B = \frac{[R][B]}{[RB]}$$

Where [R], [A], and [B] are the concentrations of free receptor, ligand A, and Ligand B and [RA] and [RB] are the concentrations of the receptor-ligand A and receptor-ligand B complexes.

The total receptor concentration,  $[R_{total}]$ , is the sum of free and bound receptors:

$$[R_{total}] = [R] + [RA] + [RB]$$

Rearrange the equilibrium equations to solve for [RA] and [RB]:

$$[RA] = \frac{[R][A]}{K_A}$$

$$[RB] = \frac{[R][B]}{K_B}$$

Substitute expressions for [RA] and [RB] into the equation above for total receptor concentration:

$$[R_{total}] = [R] + \frac{[R][A]}{K_A} + \frac{[R][B]}{K_B}$$

Factor out [R]:

$$[R_{total}] = [R] \left( 1 + \frac{[A]}{K_A} + \frac{[B]}{K_B} \right)$$

Solve for [R]:

$$[R] = \frac{[R_{total}]}{\left( 1 + \frac{[A]}{K_A} + \frac{[B]}{K_B} \right)}$$

Calculate bound fractions. Fraction of receptors bound by ligand A,  $\theta_A$ :

$$\theta_A = \frac{[RA]}{[R_{total}]}$$



Substitute  $[R] = \frac{[R_{total}]}{(1 + \frac{[A]}{K_A} + \frac{[B]}{K_B})}$  into  $[RA] = \frac{[R][A]}{K_A}$

$$[RA] = \frac{\frac{[R_{total}]}{(1 + \frac{[A]}{K_A} + \frac{[B]}{K_B})} [A]}{K_A}$$

Simplify and rearrange:

$$\theta_A = \frac{[RA]}{[R_{total}]} = \frac{[A]}{K_A + [A] + \frac{K_A[B]}{K_B}} = \frac{[A]}{[A] + K_A + \frac{K_A[B]}{K_B}} = \frac{[A]}{[A] + K_A(1 + \frac{[B]}{K_B})}$$

Under the assumption that ligand A and ligand B are in large excess compared to the receptor

$[A] \cong [A_{total}]$  and  $[B] \cong [B_{total}]$  and  $\theta_A = \frac{[A_{total}]}{[A_{total}] + K_A(1 + \frac{[B_{total}]}{K_B})}$ , which is the equation we used to

calculate the bound fraction of ligand A when in competitive binding with ligand B for the same receptor. An analogous equation exists for  $\theta_B$ ,

$$\theta_B = \frac{[B_{total}]}{[B_{total}] + K_B(1 + \frac{[A_{total}]}{K_A})}$$

| Data file          | Caption for Supplemental Datafiles                        |
|--------------------|-----------------------------------------------------------|
| Datafile1.xlsx     | Data and calculations relevant to Figure 1 panel d and e. |
| Datafile2_3h.xlsx  | RNAseq data for 3-hour ligand treatment.                  |
| Datafile2_24h.xlsx | RNAseq data for 24-hour ligand treatment.                 |
| Datafile3.xlsx     | KEGG pathway analysis, including biased signaling.        |
| Datafile4.xlsx     | Data relevant to Supp. Figures 4, 5, and 7.               |
